# Supplementary material for: Reviews and syntheses: A scoping review evaluating the potential application of ecohydrological models for northern peatland restoration
Source: Copernicus journal article supplement (doi:10.5194/bg-21-3143-2024), 2024-07-09
Supplement: Supplementary file 2 [file bg-21-3143-2024-supplement.zip]

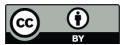

## *Supplement of*

# **Reviews and syntheses: A scoping review evaluating the potential application of ecohydrological models for northern peatland restoration**

**Mariana P. Silva et al.**

*Correspondence to:* Mariana P. Silva ([silvam@tcd.ie](mailto:silvam@tcd.ie))

- [bg-21-3143-2024-supplement-title-page.pdf](#)
- [s1.pdf](#)
- [s2.pdf](#)
- [s3.pdf](#)
- [s4.pdf](#)

The copyright of individual parts of the supplement might differ from the article licence.
