# Supplementary material for: Reviews and syntheses: A scoping review evaluating the potential application of ecohydrological models for northern peatland restoration
Source: Copernicus journal article supplement (doi:10.5194/bg-21-3143-2024), 2024-07-09
Supplement: Supplementary file 3 [file bg-21-3143-2024-supplement.zip]

**Table S3: Description of all papers included in the post-hoc second literature search in the scoping review (obtained Aug 2023). The full database is listed with an extra column categorising the papers into model categories used in the existing analysis.**

| DOI                           | YEAR  | AUTHORS                    | JOURNAL                                             | CATE-GORY      | MODEL TYPE                                                                                     | Brief description                                                                                                                                                                                                                                                                              |
|-------------------------------|-------|----------------------------|-----------------------------------------------------|----------------|------------------------------------------------------------------------------------------------|------------------------------------------------------------------------------------------------------------------------------------------------------------------------------------------------------------------------------------------------------------------------------------------------|
| 10.1080/01431161.2023.2209916 | 2023  | Ball et al.                | INTERNATIONAL JOURNAL OF REMOTE SENSING             | Remote sensing | Unnamed machine learning code                                                                  | Remote sensing plus machine learning to classify extent of restoration progress (old versus new sites)<br><i>Note:</i> no full access to article -- requested from authors but not obtained yet. So, cannot explicitly state which machine learning methods were employed                      |
| 10.5194/bg-19-5707-2022       | 2022  | Boonman et al.             | Biogeosciences                                      | Model combos   | HYDRUS-2D and unnamed peat accumulation calculations                                           | Process-based model of post-r wetting soil chemical and microbial decomposition dynamics                                                                                                                                                                                                       |
| 10.1016/j.rsase.2022.100786   | 2022  | Dabrowska-Zielinska et al. | Remote Sensing Applications-Society and Environment | Remote sensing | Unnamed                                                                                        | Combining Sentinel 2/3/MODIS data to determine GPP more accurately for various vegetation types                                                                                                                                                                                                |
| 10.1088/1748-9326/ac7969      | 2022  | Dadap et al.               | Environmental Research Letters                      | Remote sensing | Unnamed machine learning code                                                                  | Neural network to predict soil moisture spatially using baseline data and extrapolating for climate scenarios                                                                                                                                                                                  |
| 10.1080/02626667.2022.2099281 | 2022  | Dimitrov et al.            | Hydrological Sciences Journal                       | GHG dynamics   | PHM - now a part of DIMONA                                                                     | Applying PHM to a permafrost peatland and a raised bog using near-surface water content                                                                                                                                                                                                        |
| 10.7717/peerj.13418           | 2022  | Grodzka-Lukaszewska et al. | PeerJ                                               | Pure hydrology | FEFLOW                                                                                         | River-fen interactions modelling both conceptually and then using a groundwater modelling software                                                                                                                                                                                             |
| 10.1007/s10021-023-00836-2    | 2023a | He et al.                  | Ecosystems                                          | Coupled models | CoupModel                                                                                      | Modelling coupled GHG emissions and hydrological/chemical impacts on an actively extracted peatland                                                                                                                                                                                            |
| 10.5194/hess-27-213-2023      | 2023b | He et al.                  | Hydrology and Earth System Sciences                 | Coupled models | CoupModel                                                                                      | Modelling impacts of beaver damming on water levels and associated GHGs                                                                                                                                                                                                                        |
| 10.3390/rs15061673            | 2023  | Ingle et al.               | Remote Sensing                                      | GHG dynamics   | Multiple-regression statistics                                                                 | Using eddy-covariance flux measurements with Sentinel 2A satellite imagery data to model to develop a hybrid GPP model for raised bogs in different climate scenarios                                                                                                                          |
| 10.1002/eap.2702              | 2022  | Ishtiaq et al.             | Ecological Applications                             | GHG dynamics   | EvPEM (within Stella)                                                                          | Peat elevation modelling to evaluate carbon balance especially considering salinity                                                                                                                                                                                                            |
| 10.1002/rse2.363              | 2023  | Jussila et al.             | Remote Sensing in Ecology and Conservation          | Remote sensing | QGIS, R - unnamed model                                                                        | Using Sentinel-2 data and a decision tree model to quantify <i>aapa</i> mire wetness variation as a model for managing drought resistance                                                                                                                                                      |
| 10.5194/bg-20-2387-2023       | 2023  | Koch et al.                | Biogeosciences                                      | Global models  | Machine learning: gradient-boosting decision tree                                              | Predicting water table depth and calculating CO <sub>2</sub> fluxes spatially as a function of machine learning outputs for an entire country land area: later, implementing rewetting peatland scenarios                                                                                      |
| 10.1029/2021jg006774          | 2022  | Kou et al.                 | Journal of Geophysical Research-Biogeosciences      | Model combos   | NEST-DNDC, Arctic Lake Biogeochem. Model (ALBM), & random forest model for land classification | Combining remote sensing with biogeochemical modelling to compare methane fluxes among different land cover types (including peatlands)                                                                                                                                                        |
| 10.1111/gcb.16394             | 2022  | Kwon et al.                | Global Change Biology                               | GHG dynamics   | ORCHIDEE-PCH4                                                                                  | Modelling the responses of GHG fluxes to peatland drying, incorporating 3 different northern regions                                                                                                                                                                                           |
| 10.3389/feart.2022.835817     | 2022  | Lambert et al.             | Frontiers in Earth Science                          | Pure hydrology | MODFLOW                                                                                        | Investigating aquifer-peatland hydrological interactions                                                                                                                                                                                                                                       |
| 10.1002/hyp.14808             | 2023  | Link et al.                | Hydrological Processes                              | Pure hydrology | HYDRUS-1D                                                                                      | Simulations of burn depths in peat based on site hydrology                                                                                                                                                                                                                                     |
| 10.1016/j.jhydr.2022.128307   | 2022  | Liu et al.                 | Journal of Hydrology                                | Coupled models | Regression statistics                                                                          | Modelling carbon sequestration from eddy-covariance measurements to compare against climate reconstructions investigating the critical 30cm WTD hypothesis                                                                                                                                     |
| 10.1016/j.ecoleng.2022.106874 | 2023  | McCarter et al.            | Ecological Engineering                              | Coupled models | HYDRUS-1D                                                                                      | Solute transport models for industrially contaminated peatland remediation/restoration<br><i>Note:</i> Most parameters were taken from previous study and not determined from site measurements -- except for meteorological data found in Fig. S1.                                            |
| 10.1016/j.ejsobi.2023.103509  | 2023  | Pettit et al.              | European Journal of Soil Biology                    | GHG dynamics   | Energetic food web models (R-based <i>soilfoodwebs</i> )                                       | Modelling peatland soil fauna biomass and C/N fluxes based on climate warming and hydrology                                                                                                                                                                                                    |
| issn: 0379-8682               | 2023  | Puertas Orozco et al.      | Revista de Geografia Norte Grande                   | Remote sensing | ArcGIS with SAGA                                                                               | Landsat remote sensing of vegetation coverage to model vegetation change in an Andean peatland from 1985-2019<br><i>Note:</i> Paper in Spanish: abstract/title translated to English.                                                                                                          |
| 10.3389/fenvs.2023.1121969    | 2023  | Rissanen et al.            | Frontiers in Environmental Science                  | GHG dynamics   | Random Forest classification                                                                   | Modelling methane emissions from forestry-drained peatlands. Models developed to classify moss-cover versus moss-free ditches and combined with emission factors.<br><i>Note:</i> 21 total sites were used to cover all areas of the country, with measurements taken within a 25-year period. |
| 10.1002/hyp.14940             | 2023  | Ross et al.                | Hydrological Processes                              | Model combos   | Random Forest classification with unnamed hydrology model                                      | Combination of classification model (Sentinel 2 data) with catchment-scale hydrological model for Andean <i>bofedal</i> wetlands                                                                                                                                                               |
| 10.1016/j.ecoser.2022.101414  | 2022  | Schibalski et al.          | Ecosystem Services                                  | Model combos   | FEFLOW, regression statistics                                                                  | Combination of ecosystem service modelling based on land management/climate change scenarios with hydrological modelling for regional water balances, and regression models for vegetation communities                                                                                         |
| 10.3390/f13071134             | 2022  | Stenberg et al.            | Forests                                             | Model combos   | Combination of SUSI Peatland Simulator,                                                        | Evaluating the impacts of strip cutting in forested peatlands                                                                                                                                                                                                                                  |

|                                        |      |                  |                                                |              |                                                                                   |                                                                                                                                                                                                                                                                                                                                     |
|----------------------------------------|------|------------------|------------------------------------------------|--------------|-----------------------------------------------------------------------------------|-------------------------------------------------------------------------------------------------------------------------------------------------------------------------------------------------------------------------------------------------------------------------------------------------------------------------------------|
|                                        |      |                  |                                                |              | SPaFHy, and an unnamed lateral water flux model                                   |                                                                                                                                                                                                                                                                                                                                     |
| <i>10.1016/j.geoderma.2022.116055</i>  | 2022 | Tong et al.      | Geoderma                                       | GHG dynamics | Unnamed nonlinear regression                                                      | Evaluating the impacts of ditch cleaning (drainage) on GHG budgets (CO <sub>2</sub> /CH <sub>4</sub> balances) in forested peatlands, and extrapolating post-clear-cutting                                                                                                                                                          |
| <i>10.5194/bg-20-2099-2023</i>         | 2023 | Urzainki et al.  | Biogeosciences                                 | Model combos | Canal Network Model and Peat Hydrological Model -- each unnamed                   | Hydrologically modelling canal blocking and translating results to CO <sub>2</sub> emissions through a function of WTD                                                                                                                                                                                                              |
| <i>10.1002/eco.2516</i>                | 2023 | Wang and Petrone | Ecohydrology                                   | GHG dynamics | Atmosphere-Plant Exchange Simulator (APES)                                        | Measuring and modelling evaporation from hummocks and hollows in a montane fen                                                                                                                                                                                                                                                      |
| <i>10.1016/j.agrformet.2023.109364</i> | 2023 | Yuan et al.      | Agricultural and Forest Meteorology            | GHG dynamics | ELM-SPRUCE                                                                        | Simulating energy and carbon fluxes in an Amazonian peatland using a northern peatland model, parametrised for tropical peatland here but originally developed for northern peatlands; this reference will be retained because it does not split the two models but rather expands the capabilities of the northern-focussed model. |
| <i>10.1029/2021jg006762</i>            | 2022 | Zhao et al.      | Journal of Geophysical Research-Biogeosciences | GHG dynamics | Peatland Terrestrial Ecosystem Model (PTeM) and the Holocene Peatland Model (HPM) | Comparing two simulations of carbon-related variables including decomposition, peat thickness, and NPP on North American peatlands                                                                                                                                                                                                  |
